# Supplementary material for: Mulberry Fruit Cultivar ‘Chiang Mai’ Prevents Beta-Amyloid Toxicity in PC12 Neuronal Cells and in a Drosophila Model of Alzheimer’s Disease
Source: Molecules. 2020 Apr 15;25(8):1837. doi: 10.3390/molecules25081837 (PMC7221829; doi:10.3390/molecules25081837)

## Supplementary Figure 1:

High-performance liquid chromatography (HPLC) chromatograms of (A.) cyanidin chloride standard (B.) kuromanin and keracyanin standard (C.) anthocyanidin analysis of MNCM extract and (D.) anthocyanin analysis of MNCM extract. The retention times ( $R_t$ ) of cyanidin chloride, kuromanin and keracyanin in MNCM extract was also indicated

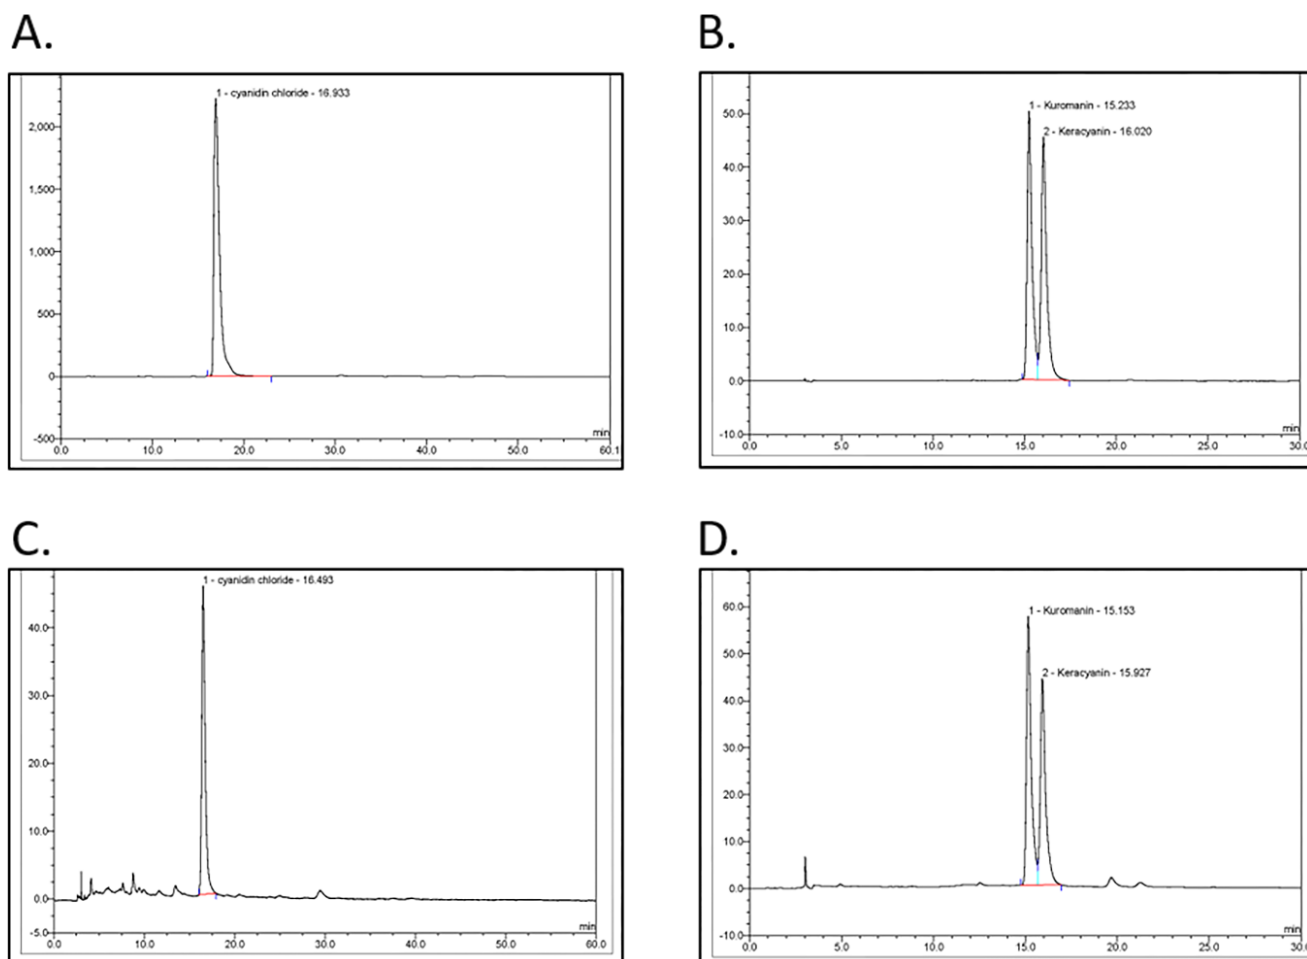

## Supplementary Figure 2:

Representative images from the neurite outgrowth study showing neurite-bearing cells of (A.) control, (B.) MNCM extract-treated cells at 50  $\mu\text{g/mL}$ , (C.) MNCM extract-treated cells at 100  $\mu\text{g/mL}$ , (D.) MNCM extract-treated cells at 150  $\mu\text{g/mL}$ , (E.) MNCM extract-treated cells at 200  $\mu\text{g/mL}$ , and (F.) NGF-treated cells at 50 ng/mL

A.

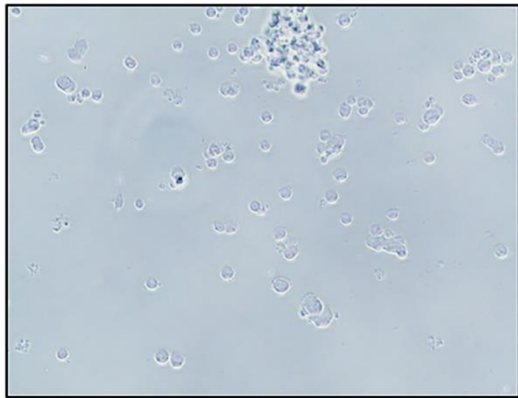

B.

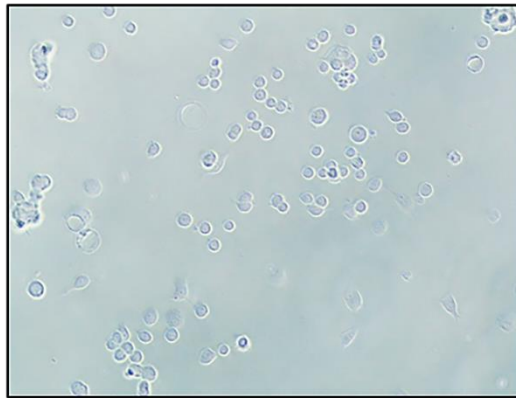

C.

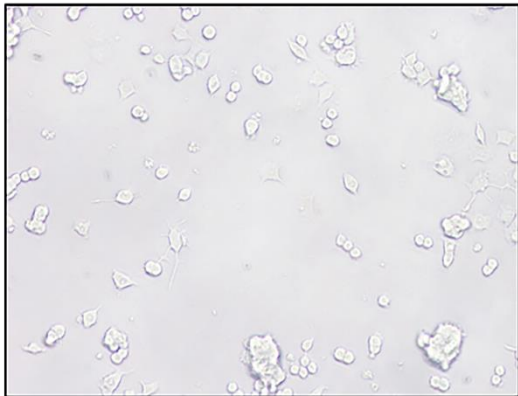

D.

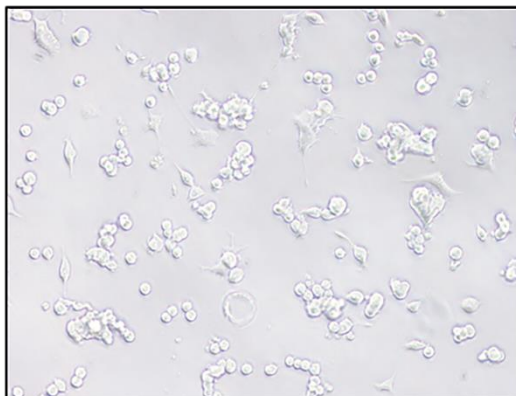

E.

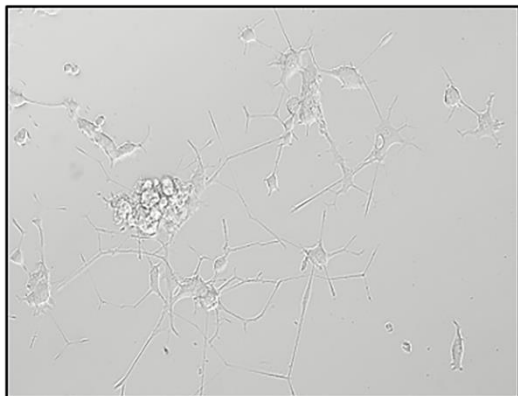

F.

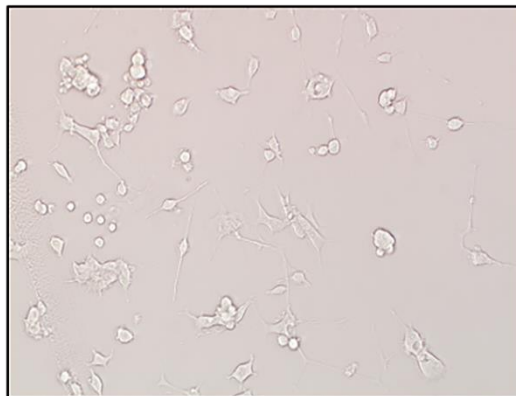

Supplement: Supplementary file 1 [file molecules-25-01837-s001.pdf]
